# Supplementary material for: A novel pH-responsive monomer inhibits Candida albicans via a dual antifungal mode of action
Source: Royal Society of Chemistry journal article supplement (doi:10.1039/d4tb00851k), 2024-01-01
Supplement: d4tb00851k1.pdf [file d4tb00851k1.pdf]

## Novel pH-responsive monomer inhibit *Candida albicans* via dual antifungal modes of action

Received 00th January 20xx,  
 Accepted 00th January 20xx

Hao Li, †<sup>abc</sup> Yangyang Shi, †<sup>ab</sup> Hui Chen, †<sup>ad</sup> Jingou Liang,<sup>ae</sup> Shiyong Zhang,<sup>f</sup> Bolei Li,<sup>ab</sup> Jing Chen,<sup>ab</sup> Mingyun Li,<sup>a</sup> Xian Peng,<sup>a</sup> Xuedong Zhou,<sup>a</sup> Biao Ren <sup>\*a</sup> and Lei Cheng <sup>\*ab</sup>

DOI: 10.1039/x0xx00000x

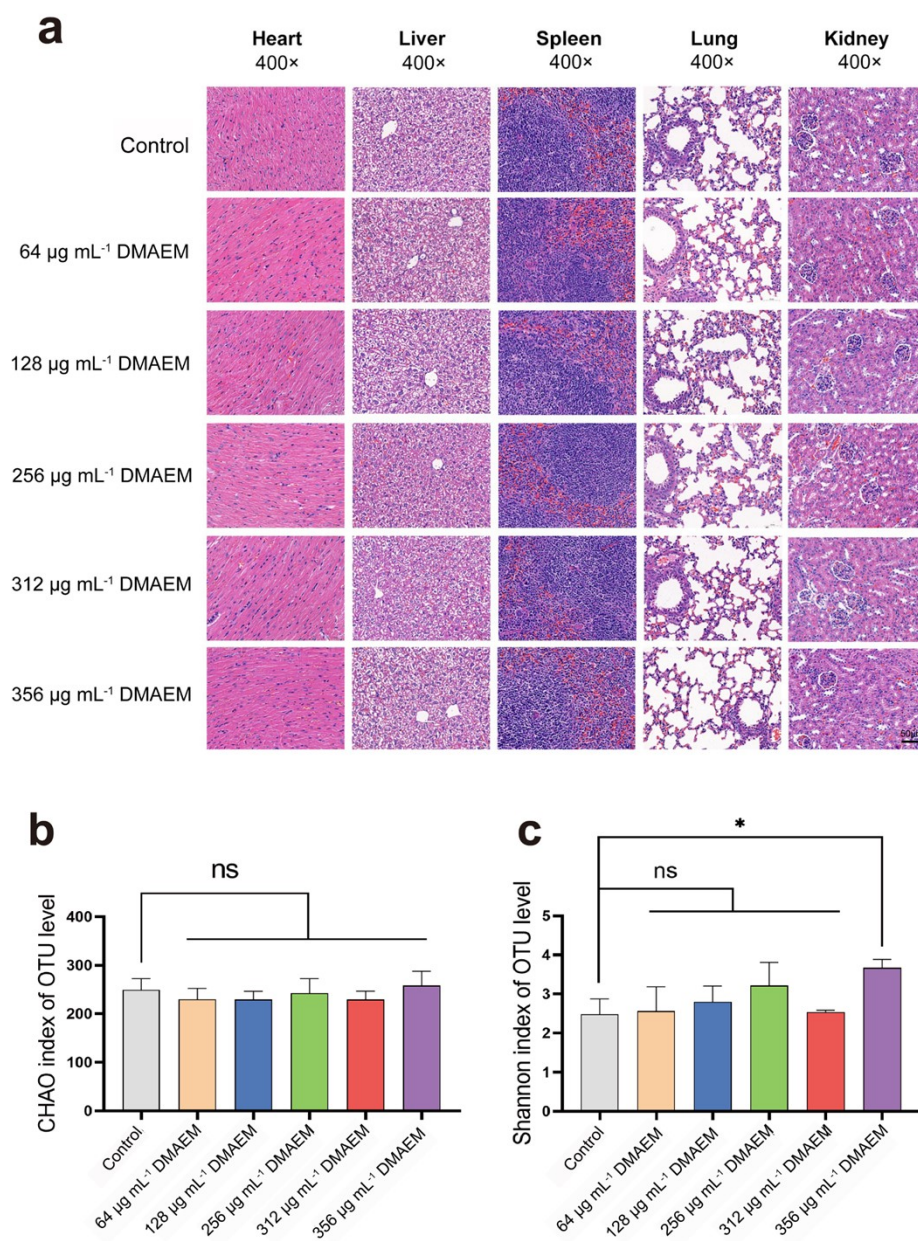

**Fig. S1.** DMAEM exhibited excellent biosafety *in vivo*. (a) Histological sections of mouse main organs tissue with H&E staining (nucleus in blue, and cytoplasm in purple) after 2-day topical administration with saline or DMAEM. (b) CHAO index of gut microbiome after 2-day topical administration of saline or DMAEM (n = 4, mean values ± s.d.). (c) Shannon index of gut microbiome after 2-day topical administration of saline or DMAEM (n = 4, mean values ± s.d.). Significance was assessed using Mann–Whitney U testing (b, c). \**p* < 0.05, ns, not significant.

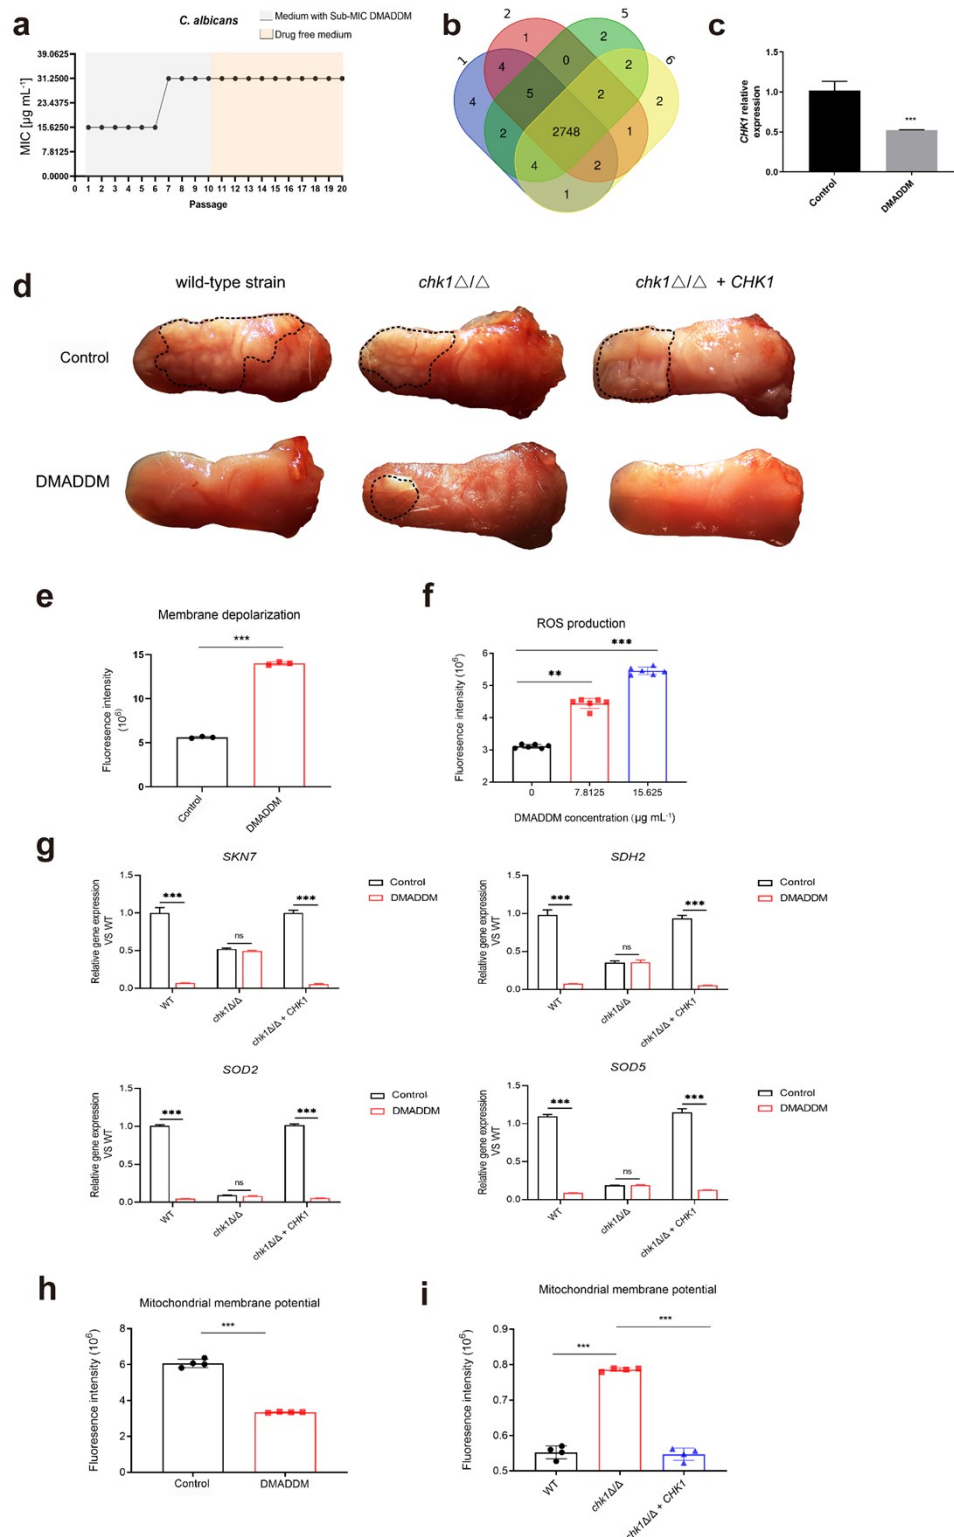

**Fig. S2.** DMAEM protonated into a cationic fungicide sharing similar structural and functional characteristics with DMADDM, which exerted fungicidal activities by targeting a two-component system *CHK1* which induces downstream accumulation of reactive oxygen species (ROS) and fungal apoptosis. (a) Sub-inhibitory concentration stimulation to induce DMADDM-resistant strains. (b) Single nucleotide polymorphisms (SNPs) in the four DMADDM-resistant strains. (c) *CHK1* relative expression in wild-type strain. (d) Photograph of mice tongues infected with *C. albicans*. The area enclosed by the black dotted indicates the pseudomembranous lesion caused by *C. albicans* infection. (e) Membrane depolarization of wild-type *C. albicans* strain after treatment with 250  $\mu\text{g mL}^{-1}$  DMADDM ( $n = 6$ , mean values  $\pm$  s.d.). (f) Intracellular ROS in wild-type strain, *chk1* $\Delta/\Delta$ , *chk1* $\Delta/\Delta$ +*CHK1* after DMADDM exposure. (g) Relative Gene expression in strains including *SKN7* and other ROS-scavenging genes (*SDH2*, *SOD2*, *SOD5*). (h) Mitochondrial membrane potential of wild-type *C. albicans* strain after treatment with 15.625  $\mu\text{g mL}^{-1}$  DMADDM ( $n = 4$ , mean values  $\pm$  s.d.). (i) Mitochondrial membrane potential of wild-type strain, *chk1* $\Delta/\Delta$ , *chk1* $\Delta/\Delta$ +*CHK1* after 15.625  $\mu\text{g mL}^{-1}$  DMADDM exposure ( $n = 4$ , mean values  $\pm$  s.d.). Student's t-tests (c, e, g, h) and one-way ANOVA with Tukey post-test (f, i) were performed. \*\* $p < 0.01$ , \*\*\* $p < 0.001$ , ns, not significant.

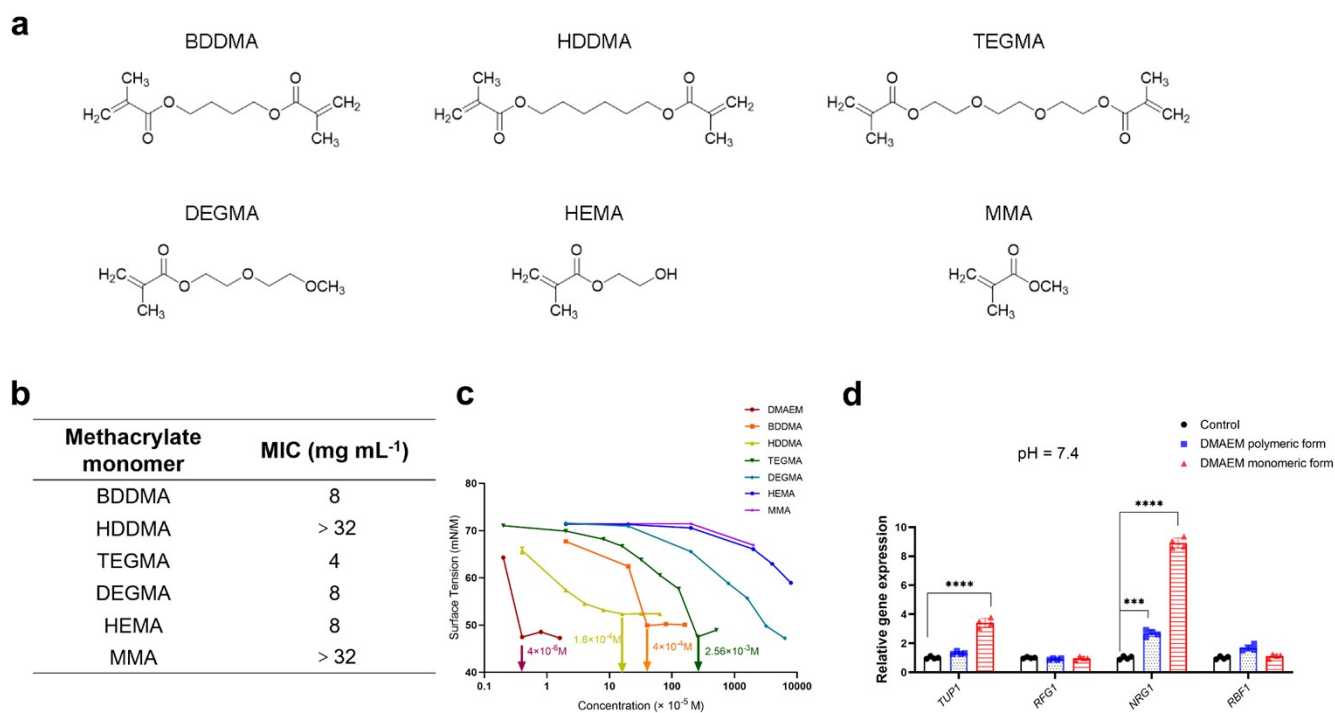

**Fig. S3.** The double-bond structure, together with hydrophobicity, are key factors in DMAEM inhibition of filamentation. (a) Structures of methacrylate compounds. (b) MIC of methacrylate compounds against *C. albicans* at neutral pH. (c) The critical micelle concentration values were obtained at the intersection of the surface tension curve versus the logarithmic value of the methacrylates concentration at pH 7.4. (d) Expression of filamentation-associated genes in *C. albicans* after 4 h exposure to PBS, DMAEM in either monomeric form or polymer form ( $n = 4$ , mean values  $\pm$  s.d.). Student's t-tests was performed. \*\*\* $p < 0.001$ , \*\*\*\* $p < 0.0001$ .

**Table S1. *C. albicans* strains used in this study.**

| Strain name                | genotype                                                                       |
|----------------------------|--------------------------------------------------------------------------------|
| SC5314                     | Parent strain, ATCC MYA-2876                                                   |
| Wild type (WT)             | SC5314, $\Delta$ <i>ura3::imm434/URA3</i>                                      |
| $\Delta$ <i>chk1</i>       | <i>Dura3::imm434/Dura3::imm434</i><br><i>Dchk1::hisG/Dchk1::hisG-URA3-hisG</i> |
| $\Delta$ <i>chk1/chk1+</i> | <i>Dura3::imm434/Dura3::imm434</i><br><i>Dchk1::hisG/CHK1::URA3-hisG</i>       |

**Table S2. Real-time PCR primers used in this study. #**

| Primers           | Nucleotide Sequence (5'to3') |
|-------------------|------------------------------|
| <i>18S</i> rRNA-F | TCTTTCTTGATTTTGTGGGTGG       |
| <i>18S</i> rRNA-R | TCGATAGTCCCTCTAAGAAGTG       |
| <i>CHK1</i> -F    | ATCCGGTGAAAGCGGAAGAG         |
| <i>CHK1</i> -R    | AACTGCTGCTGCTCGAAGAT         |
| <i>SKN7</i> -F    | GGTCCAATATCATCAGATACAGCAT    |
| <i>SKN7</i> -R    | AGATTCTGTCCAAGTGACTGTTGTT    |
| <i>SDH2</i> -F    | GGTTCGTGTGCCATGAACATT        |
| <i>SDH2</i> -R    | ATCAAGACTGCTGGACCCAAG        |
| <i>SOD2</i> -F    | ACAAGCCGTTGAAGCCAAATC        |
| <i>SOD2</i> -R    | AGGTAACCACCACCGTTGAA         |
| <i>SOD5</i> -F    | CTCCTCAAGGTAATGGCGCT         |
| <i>SOD5</i> -R    | AGGCAGCAATGACACCAACTA        |
| <i>TUP1</i> -F    | CTTGGAGTTGGCCCATAGAA         |
| <i>TUP1</i> -R    | TGGTGCCACAATCTGTTGTT         |
| <i>RFG1</i> -F    | AACCCTGAAGTTTCCCGAGAA        |
| <i>RFG1</i> -R    | CAGCAAGATTATTCCAATGTTTCCTT   |
| <i>NRG1</i> -F    | CCAAGTACCTCCACCAGCAT         |
| <i>NRG1</i> -R    | GGGAGTTGGCCAGTAAATCA         |
| <i>RBF1</i> -F    | CATGTCAGAGATGCGCTCACT        |
| <i>RBF1</i> -R    | ATGACCAGGTTTCATCGGGTT        |

# F: forward; R: reverse.

**Table S3. Function information of high-frequency mutated genes.**

| Gene name   | Location                   | Description                                                                                                                                                                                                                                            |
|-------------|----------------------------|--------------------------------------------------------------------------------------------------------------------------------------------------------------------------------------------------------------------------------------------------------|
| <i>DAL1</i> | scaffold127/exonic/C1013T  | Putative allantoate permease, involved in the regulation of nitrogen-degradation genes; required for yeast cell adherence to silicone substrate; Spider biofilm induced                                                                                |
| <i>SIR2</i> | scaffold226/exonic/C11059C | Required for wild-type lifespan, asymmetric inheritance of oxidatively damaged proteins, rDNA silencing; regulates phenotypic switch in strain 3153A, not WO-1; partially complements <i>S. cerevisiae</i> sir2 mating defect; Spider biofilm induced  |
| <i>RRN6</i> | scaffold47/exonic/C29547T  | Predicted component of the core factor rDNA transcription factor complex; required for transcription of 35S rRNA genes by RNA polymerase I in <i>S. cerevisiae</i> ; possibly an essential gene, disruptants not obtained by UAU1 method               |
| <i>CHS5</i> | scaffold107/exonic/T10626C | Putative chitin biosynthesis protein; fungal-specific; repressed upon yeast-to-hypha switch; rat catheter biofilm repressed                                                                                                                            |
| <i>YAT2</i> | scaffold144/exonic/G21815A | Peroxisomal carnitine acetyl transferase; no obvious metabolic, hyphal, virulence defects in Ura <sup>+</sup> strain; induced by macrophage engulfment, hyphal growth, starvation, nonfermentable carbon sources; rat catheter, Spider biofilm induced |
| <i>CCZI</i> | scaffold233/exonic/T1293C  | Protein involved in oxidative stress response and autophagy; mutants have fragmented mitochondria and                                                                                                                                                  |

|               |                            |                                                                                                                                                                                                                                           |
|---------------|----------------------------|-------------------------------------------------------------------------------------------------------------------------------------------------------------------------------------------------------------------------------------------|
|               |                            | attenuated virulence                                                                                                                                                                                                                      |
| <i>NUP188</i> | scaffold140/exonic/T12028C | Putative nuclear pore complex subunit; transcript regulated by Nrg1 and Mig1                                                                                                                                                              |
| <i>DPB11</i>  | scaffold627/exonic/T1337C  | Ortholog(s) have DNA polymerase binding, protein kinase activator activity, protein-containing complex scaffold activity                                                                                                                  |
| <i>SEC16</i>  | scaffold351/exonic/T440C   | Ortholog(s) have protein membrane anchor activity and role in COPII vesicle coating, macroautophagy, protein localization to endoplasmic reticulum exit site                                                                              |
| <i>NUP120</i> | scaffold187/exonic/C3860A  | Ortholog(s) have structural constituent of nuclear pore activity                                                                                                                                                                          |
| <i>ESPI</i>   | scaffold447/exonic/A6390G  | Putative caspase-like cysteine protease; mutation confers increased sensitivity to nocodazole; periodic mRNA expression, peak at cell-cycle S/G2 phase; mRNA binds She3                                                                   |
| <i>NUP133</i> | scaffold405/exonic/A3228G  | Ortholog(s) have structural constituent of nuclear pore activity                                                                                                                                                                          |
| <i>RIF1</i>   | scaffold31/exonic/A30649G  | Protein involved in sub-telomeric silencing and regulation of biofilm formation; involved in regulation of telomere length; mutants display increased colonization of mouse kidneys relative to wild-type; required for silencing at MTL3 |
| <i>SAP2</i>   | scaffold239/exonic/A13890T | Secreted aspartyl proteinase; acts in utilization of protein as nitrogen source; assessment of virulence role                                                                                                                             |

|              |                            |                                                                                                                                                                                                                                                 |
|--------------|----------------------------|-------------------------------------------------------------------------------------------------------------------------------------------------------------------------------------------------------------------------------------------------|
|              |                            | complicated by URA3 effects; regulated by growth phase, alpha-pheromone; produced by opaque cells                                                                                                                                               |
| <i>EIF4G</i> | scaffold750/exonic/A759G   | Putative translation initiation factor eIF4G; overexpression causes hyperfilamentation; hyphal- and macrophage-induced; genes encoding some translation factors are downregulated upon phagocytosis by murine macrophage                        |
| <i>UTP20</i> | scaffold42/exonic/C5210A   | Putative snoRNA-binding protein; <i>S. cerevisiae</i> Utp20 ortholog; likely essential for growth; repressed in core stress response; mutation confers resistance to 5-fluorocytosine (5-FC) and parnafungin                                    |
| <i>SWR1</i>  | scaffold252/exonic/G8503C  | Component of the SWR1 complex, which has a role in exchanging histone variant H2AZ for histone H2A in chromatin; required for proper nucleosome positioning on WOR1 promoter                                                                    |
| <i>NAF1</i>  | scaffold82/exonic/G25130A  | Putative RNA-binding protein; role in assembly of box H/ACA snoRNPs and thus pre-rRNA processing; Spider biofilm induced                                                                                                                        |
| <i>UME6</i>  | scaffold184/exonic/A17463C | Zn(II)2Cys6 transcription factor; has a long 5'-UTR that regulates translational efficiency and controls transition to filamentous growth; stability controlled by Grr1p, Ubr1p, Ptc2p in response to CO <sub>2</sub> and O <sub>2</sub> levels |
| <i>ATG2</i>  | scaffold6/exonic/G83123A   | Protein described as similar to <i>S. cerevisiae</i> sporulation protein; ortholog of <i>S. cerevisiae</i> Atg2, an autophagic                                                                                                                  |



|              |                            |                                                                                                                                                                                                                                             |
|--------------|----------------------------|---------------------------------------------------------------------------------------------------------------------------------------------------------------------------------------------------------------------------------------------|
|              |                            | vesicle formation protein; up-regulation associated with azole resistance; Spider biofilm induced                                                                                                                                           |
| <i>BMS1</i>  | scaffold305/exonic/T4731A  | Putative GTPase; Hap43-induced gene; mutation confers resistance to 5-fluorocytosine (5-FC); flucytosine induced; repressed by prostaglandins; Spider biofilm induced                                                                       |
| <i>GPI7</i>  | scaffold104/exonic/A1379G  | Protein involved in attachment of GPI-linked proteins to cell wall; member of major facilitator superfamily; phosphodiesterase/nucleotide pyrophosphatase domain; similar to <i>S. cerevisiae</i> Gpi7p                                     |
| <i>FOL1</i>  | scaffold90/exonic/A14527G  | Putative dihydroneopterin aldolase (dihydro-6-hydroxymethylpterin pyrophosphokinase); fungal-specific (no human or murine homolog)                                                                                                          |
| <i>NUP82</i> | scaffold764/exonic/C256T   | Linker nucleoporin of the nuclear pore complex; role in mRNA and export from nucleus, protein import into nucleus, ribosomal large subunit export from nucleus, ribosomal small subunit export from nucleus; rat catheter biofilm repressed |
| <i>MEC1</i>  | scaffold117/exonic/A18901G | Cell cycle checkpoint protein with a role in genome integrity; RNA abundance regulated by tyrosol and cell density                                                                                                                          |
| <i>PIF1</i>  | scaffold117/exonic/G19795T | DNA helicase and 3'-5' exonuclease; decreased transcription is observed upon fluphenazine treatment                                                                                                                                         |
| <i>PEX14</i> | scaffold279/exonic/G10836A | Ortholog(s) have peroxisome matrix targeting signal-1                                                                                                                                                                                       |

|              |                            |                                                                                                                                                                                                                                                                       |
|--------------|----------------------------|-----------------------------------------------------------------------------------------------------------------------------------------------------------------------------------------------------------------------------------------------------------------------|
|              |                            | binding, peroxisome matrix targeting signal-2 binding, protein binding, bridging activity                                                                                                                                                                             |
| <i>APC5</i>  | scaffold216/exonic/C2387T  | Ortholog(s) have ubiquitin protein ligase activity, role in anaphase-promoting complex-dependent catabolic process, chromatin assembly, protein ubiquitination and anaphase-promoting complex localization                                                            |
| <i>RAD50</i> | scaffold192/exonic/G11349C | Putative DNA double-strand break repair factor; involved in response to oxidative stress and drug resistance; flow model biofilm repressed                                                                                                                            |
| <i>VPS41</i> | scaffold173/exonic/C1964T  | Protein similar to <i>S. cerevisiae</i> Vps41p, which is involved in vacuole organization and biogenesis; transposon mutation affects filamentous growth; regulated by Gcn4p; induced in response to amino acid starvation (3-aminotriazole treatment)                |
| <i>ALG6</i>  | scaffold435/exonic/T967C   | Putative glucosyltransferase involved in cell wall mannan biosynthesis; transcription is elevated in <i>chk1</i> , <i>nik1</i> , and <i>sln1</i> homozygous null mutants; repressed by nitric oxide; possibly essential gene, disruptants not obtained by UAU1 method |
| <i>PANI</i>  | scaffold28/exonic/G29181A  | Essential protein involved in endocytosis and polarized growth; ortholog of <i>S. cerevisiae</i> Pan1, which is a part of a complex that regulates actin cytoskeleton; Spider biofilm repressed                                                                       |
| <i>LEU3</i>  | scaffold178/exonic/A10984T | Zn(II)2Cys6 transcription factor; predicted regulator                                                                                                                                                                                                                 |

|             |                            |                                                                                                                                                                                                                                                |
|-------------|----------------------------|------------------------------------------------------------------------------------------------------------------------------------------------------------------------------------------------------------------------------------------------|
|             |                            | branched-chain amino acid biosynthesis genes; alkaline induced; induced by Msn11 under weak acid stress; required for yeast cell adherence to silicone substrate; Spider biofilm induced                                                       |
| <i>SSK2</i> | scaffold67/exonic/T18922A  | MAP kinase kinase kinase (MAPKKK); regulates Hog1 activation and signaling; repressed by ciclopirox olamine<br>MAP                                                                                                                             |
| <i>CHK1</i> | scaffold28/exonic/C45325T  | Histidine kinase; 2-component signaling, cell wall synthesis; hyphal growth defect; avirulent in mouse, not rat vaginal infection; phagocytosis rate increased; Spider biofilm induced; required for RPMI biofilm; Bcr1-induced in a/a biofilm |
| <i>NAB3</i> | scaffold236/exonic/A818T   | Putative nuclear polyadenylated RNA-binding protein; flucytosine repressed                                                                                                                                                                     |
| <i>APC1</i> | scaffold11/exonic/G35646A  | Putative Anaphase-Promoting Complex/Cyclosome subunit; essential for growth; periodic mRNA expression, peak at cell-cycle S/G2 phase                                                                                                           |
| <i>ARO1</i> | scaffold73/exonic/C718T    | Putative pentafunctional arom enzyme; required for aromatic amino acid biosynthesis; involved in cell wall integrity and formation of biofilm; fungal-specific (no human or murine homolog); Gcn2p-, Gcn4p-regulated                           |
| <i>TBF1</i> | scaffold107/exonic/C18397T | Essential transcription factor; induces ribosomal protein genes and the rDNA locus; acts with Cbf1 at subset of promoters; recruits Fhl1 and Ifh1 to promoters; role is                                                                        |

|             |                            |                                                                                                                                                                                                                                          |
|-------------|----------------------------|------------------------------------------------------------------------------------------------------------------------------------------------------------------------------------------------------------------------------------------|
|             |                            | analogous to that of <i>S. cerevisiae</i> Rap1; Spider biofilm induced                                                                                                                                                                   |
| <i>PLB1</i> | scaffold23/exonic/A66147C  | Phospholipase B; host cell penetration and virulence in mouse systemic infection; Hog1-induced; signal sequence, N-glycosylation, and Tyr phosphorylation site; induced in fluconazole-resistant strains; rat catheter biofilm repressed |
| <i>MBP1</i> | scaffold136/exonic/C19606T | Putative component of the MBF transcription complex involved in G1/S cell-cycle progression; non-periodic mRNA expression; predicted, conserved MBF binding sites upstream of G1/S-regulated genes                                       |
| <i>ORC4</i> | scaffold178/exonic/T4338C  | Phosphorylated protein similar to <i>S. cerevisiae</i> Orc4, subunit of the origin recognition complex (ORC); induced by alpha pheromone in SpiderM medium                                                                               |
| <i>LAS1</i> | scaffold6/exonic/A80729G   | Putative bud formation and morphogenesis protein; mutation confers hypersensitivity to 5-fluorocytosine (5-FC), 5-fluorouracil (5-FU); macrophage-induced; Spider biofilm induced                                                        |
| <i>PEX1</i> | scaffold302/exonic/A6702G  | Peroxisomal ATPase involved in import of peroxisomal matrix proteins; involved in oxidative stress tolerance                                                                                                                             |
| <i>SWE1</i> | scaffold245/exonic/C10171T | Putative protein kinase with a role in control of growth and morphogenesis, required for full virulence; mutant cells are small, rounded, and sometimes binucleate; not required for filamentous growth; mutant is hypersensitive        |

|              |                            |                                                                                                                                                                                                                                             |
|--------------|----------------------------|---------------------------------------------------------------------------------------------------------------------------------------------------------------------------------------------------------------------------------------------|
|              |                            | to caspofungin                                                                                                                                                                                                                              |
| <i>VPS51</i> | scaffold416/exonic/T6077C  | Protein with a role in vacuolar function; null mutant has defect in damaging oral epithelial and vascular endothelial cells; required for normal hyphal growth and stress resistance; induced in presence of host oral or vascular cells    |
| <i>DDC1</i>  | scaffold256/exonic/T10407A | Putative DNA damage checkpoint protein; transcript induced during filamentous growth; regulated by Nrg1, Tup1                                                                                                                               |
| <i>TFC3</i>  | scaffold33/exonic/G69417A  | Putative DNA-binding transcription factor; merged with orf19.3833 in Assembly 20                                                                                                                                                            |
| <i>SKO1</i>  | scaffold146/exonic/T13511G | bZIP transcription factor involved in cell wall damage response; represses the yeast-to-hypha transition; mutants are caspofungin sensitive; induced by osmotic stress via Hog1; activated by Rlm1p; induced by Mnl1 under weak acid stress |
| <i>TMT1</i>  | scaffold442/exonic/G5730A  | Ortholog(s) have trans-aconitate 3-methyltransferase activity and cytosol localization                                                                                                                                                      |
